# Supplementary material for: A Lightweight Distributed Framework for Computational Offloading in Mobile Cloud Computing
Source: PLoS One. 2014 Aug 15;9(8):e102270. doi: 10.1371/journal.pone.0102270 (PMC4134188; doi:10.1371/journal.pone.0102270)
Supplement: Table S1 — Comparison of Application Processing Time (ms) of the Sort Service Component. (XLSX) [file pone.0102270.s001.xlsx]

## Sheet: Table S1
Table S1: Comparison of Application Processing Time (ms) of the Sort Service Component
SNO	Sorting Length	TT on Local SMD	TT in DCOF Based Computational Offloading	TT in Traditional Computational Offloading	Difference in TT
1	11000	4876	2559	24331	89.4826
2	12000	5510	2902	28267	89.7336
3	13000	6566	3132	31609	90.0914
4	14000	6989	3345	35115	90.4742
5	15000	7406	3494	37010	90.5593
6	16000	7450	3757	38571	90.2595
7	17000	10414	3888	42244	90.7963
8	18000	11457	4379	47714	90.8224
9	19000	11857	4579	49481	90.7459
10	20000	13221	4864	54599	91.0914
11	21000	13774	5222	58953	91.1421
12	22000	14410	5461	63141	91.3511
13	23000	15579	5838	69280	91.5733
14	24000	16059	6171	73368	91.589
15	25000	16950	6770	76615	91.1636
16	26000	17764	6844	81668	91.6197
17	27000	18421	7377	87634	91.582
18	28000	19176	7885	92439	91.4701
19	29000	20179	8436	97729	91.368
20	30000	20987	8525	107042	92.0358
21	31000	21600	8989	119084	92.4515
22	32000	22565	9378	120380	92.2097
23	33000	24701	10042	124931	91.962
24	34000	25687	10328	128864	91.9853
25	35000	25825	10790	135006	92.0078
26	36000	26432	10914	139564	92.1799
27	37000	26910	11704	148009	92.0924
28	38000	28859	12537	154216	91.8705
29	39000	29968	13182	157490	91.6299
30	40000	31207	13416	166457	91.9403
Average		17426.6	7223.6	86360	91.3094
% Change		84.3753	58.5485	91.6355
