# Supplementary material for: A Lightweight Distributed Framework for Computational Offloading in Mobile Cloud Computing
Source: PLoS One. 2014 Aug 15;9(8):e102270. doi: 10.1371/journal.pone.0102270 (PMC4134188; doi:10.1371/journal.pone.0102270)
Supplement: Table S2 — Comparison of Application Processing Time of Matrix Multiplication Service. (XLSX) [file pone.0102270.s002.xlsx]

## Sheet: Table S2
Table S2: Comparison of Application Processing Time of Matrix Multiplication Service
SNO	Matrix Length	TT on Local SMD	TT in DCOF Based Computational Offloading	TT in Traditional Computational Offloading	Difference in TT
1	160*160	3653	3294	16431	79.9525
2	170*170	4276	3889	18296	78.744
3	180*180	4781	4308	21132	79.6139
4	190*190	5030	4451	22170	79.9233
5	200*200	6321	5661	26061	78.2779
6	210*210	7039	6287	27927	77.4877
7	220*220	7777	6929	29878	76.809
8	230*230	8888	7916	33920	76.6627
9	240*240	10735	9589	38052	74.8003
10	250*250	13090	11724	44310	73.541
11	260*260	13642	12177	46841	74.0035
12	270*270	14471	12805	50412	74.5993
13	280*280	16411	14546	55178	73.638
14	290*290	20524	18448	64414	71.3603
15	300*300	20706	18599	67346	72.3829
16	310*310	21185	18883	68692	72.5106
17	320*320	27028	24444	80922	69.7931
18	330*330	28452	25317	84709	70.113
19	340*340	39691	34666	110506	68.6298
20	350*350	38570	35016	108677	67.7798
21	360*360	40096	36406	114062	68.0823
22	370*370	44896	40720	125149	67.4628
23	380*380	48088	43402	134100	67.6346
24	390*390	55560	50381	148747	66.1297
25	400*400	57339	51775	156489	66.9146
26	410*410	62405	55762	171252	67.4386
27	420*420	63159	56467	184056	69.3208
28	430*430	74424	67278	213507	68.4891
29	440*440	78163	70400	221092	68.1581
30	450*450	99286	91038	262697	65.3449
Average		31189.5	28085.9	91568	72.1866
% Change		96.3207	9.95077	69.3278
